# Supplementary material for: PyunBBX18 Is Involved in the Regulation of Anthocyanins Biosynthesis under UV-B Stress
Source: MDPI journal article supplement (doi:10.3390/genes13101811), 2022-10-07
Supplement: s1 [file s1]

Table S1. Primers for RT-qPCR

| Gene name        | Forward Primer(5' to 3') | Reverse Primer(5' to 3') |
|------------------|--------------------------|--------------------------|
| <i>PyunBBX3</i>  | ACCCATGTGTCTGCTCATCA     | GGCCCAAAATTCTCCAATCC     |
| <i>PyunBBX4</i>  | CCGAAGAAGAGGTAGACGATGA   | TAGAGTTGCTGCCGCCATT      |
| <i>PyunBBX12</i> | GTGAGGAGGAGGAGGATGAAG    | CTGCCGTTGCTGTTGATGAT     |
| <i>PyunBBX13</i> | AGGTGTAAGGCTCTCTGCTTCT   | CCGTTGTTGCTGATGCTGTCTC   |
| <i>PyunBBX18</i> | GGATTTGGATCGGTATGTGG     | ACCAAAGCAGGAGCTTGAAA     |
| <i>PyunBBX42</i> | GGTTCGGAAATGGATTCGTA     | TTACTTTGCACAGGCACCAC     |
| <i>HIS</i>       | TTTAAGACTGATCTGCGTTTCC   | GAACAGCCCAACAAGGTATG     |

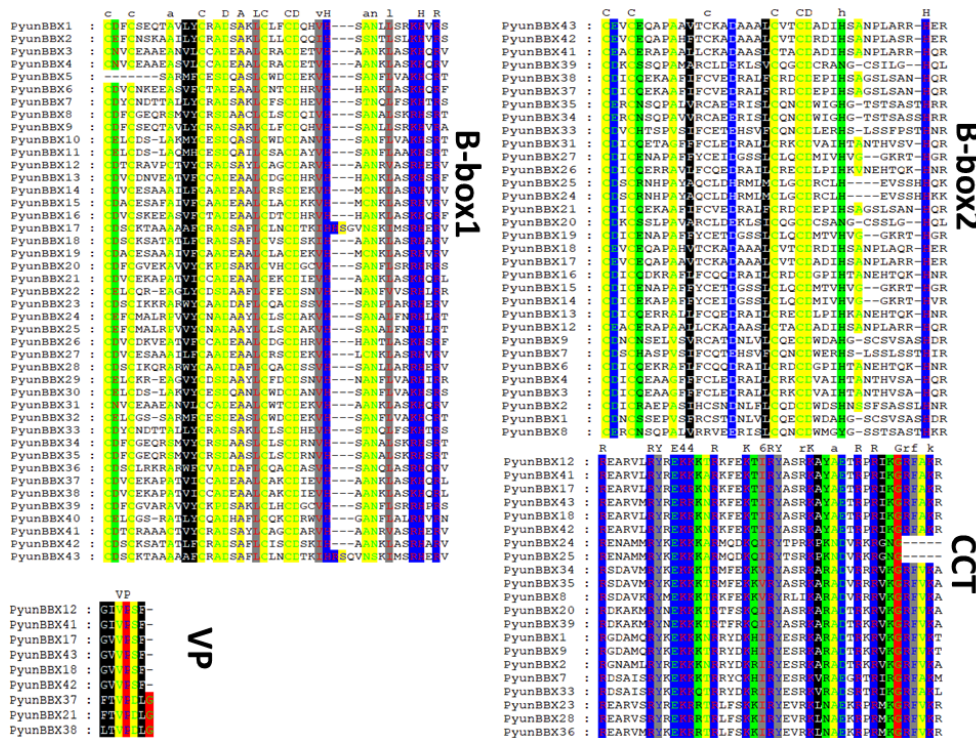

Figure S1. Amino acid sequences of conserved domains (B-box1/B-box2, CCT and VP) of BBX genes family in *P. yunnanensis*.

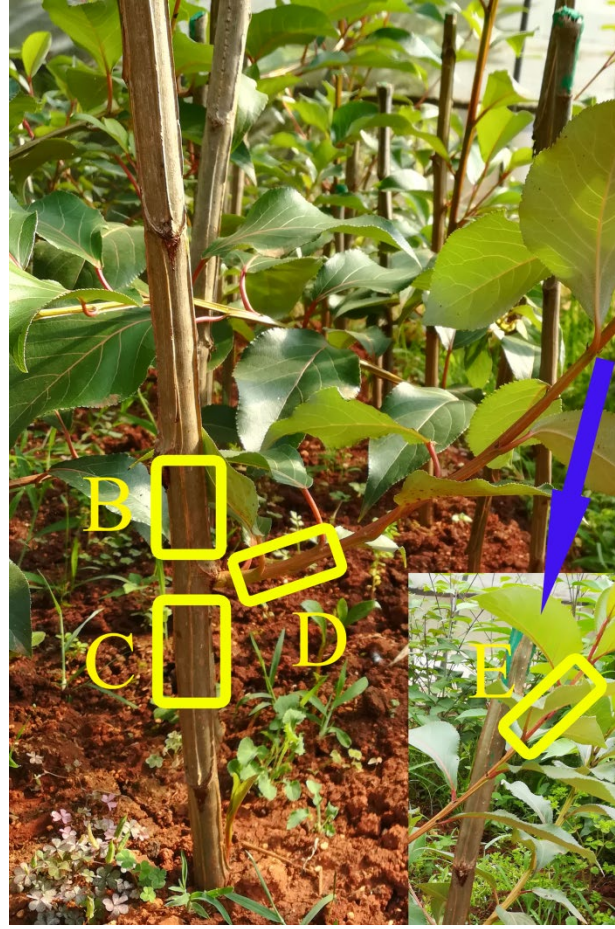

**Figure S2.** Sampling positions on the cuttings of *P. yunnanensis* [62] (Fig S1). B: BU, C: CU, D: DU, E: EU.

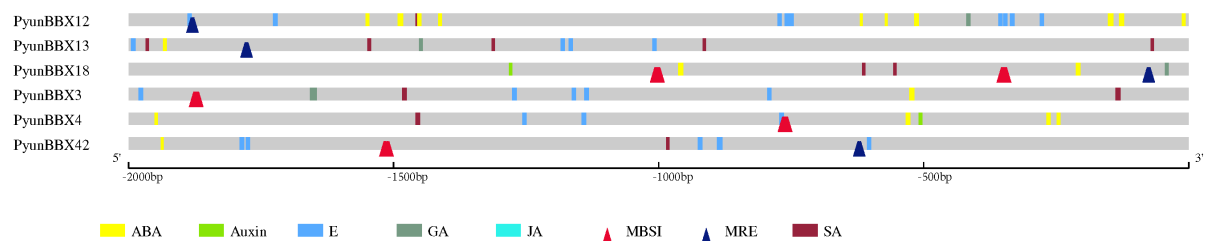

**Figure S3.** Cis-acting elements of six *PyunBBX* genes. ABA, Cis-acting elements of abscisic acid responsiveness, Auxin, Cis-acting elements of auxin responsiveness, E, Ethylene responsiveness, GA, Cis-acting elements of gibberelins responsiveness, JA, Cis-acting elements of jasmonic acid responsiveness, MBSI, MYB binding site involved in flavonoid biosynthetic genes regulation, MRE, MYB binding site involved in light responsiveness, SA, Cis-acting elements of salicylic acid responsiveness.
